# Supplementary material
Source: publisher figshare collection journal article supplement (https://plos.figshare.com/articles/dataset/_/808666)
Supplement: Supplementary file [file 1]

**Supplemental Table S2. Studies that have used fluorescent protein to investigate RAD51 foci formation and function.** FP: Fluorescent protein. Ns: Not shown; CHO: Chinese Hamster Ovary; ES cells: Embryonic Stem cells.

| Reference | FP            | N- or C-Term. fusion | Complementation                                                        | Foci (somatic cells) | Foci (Meiotic cells) | Organism                                    |
|-----------|---------------|----------------------|------------------------------------------------------------------------|----------------------|----------------------|---------------------------------------------|
| [1-3]     | YFP           | N-terminal           | Partial complementation                                                | +                    | Ns                   | <i>Saccharomyces cerevisiae</i>             |
| [4, 5]    | YFP           | N-terminal           | Complementation <sup>1</sup>                                           | +                    | Ns                   | <i>Saccharomyces cerevisiae</i>             |
| [6, 7]    | GFP           | N-terminal           | Mutant not shown but no dominant negative effect                       | +                    | Ns                   | CHO cells and mouse ES cells                |
| [8]       | GFP, YFP, CFP | N-terminal           | Mutant not shown but no dominant negative effect                       | +                    | Ns                   | CHO cells and mouse ES cells                |
| [9]       | GFP           | N-terminal           | Complementation and no dominant negative effect                        | +                    | Ns                   | mouse ES cells                              |
| [10]      | GFP           | N-terminal           | Complementation                                                        | +                    | Ns                   | Human cells (HEK293)                        |
| [11]      | GFP           | N-terminal           | Complementation                                                        | +                    | Ns                   | Human cells (HEK293) and Chicken DT40 cells |
| [12]      | GFP           | N-terminal           | Complementation                                                        | +                    | Ns                   | Human cells (HEK293)                        |
| [13-15]   | GFP           | N-terminal           | Partial complementation and no dominant negative effect                | +                    | Ns                   | <i>Ustilago maydis</i>                      |
| [16]      | GFP           | N-terminal           | Complementation                                                        | +                    | Ns                   | <i>Magnaporthe oryzae</i>                   |
| [17]      | CFP           | C-terminal           | Ns                                                                     | +                    | Ns                   | <i>Saccharomyces cerevisiae</i>             |
| [18]      | CFP           | C-terminal           | Ns                                                                     | +                    | Ns                   | <i>Saccharomyces cerevisiae</i>             |
| [19, 20]  | CFP           | C-terminal           | Does not complement                                                    | +                    | Ns                   | <i>Schizosaccharomyces pombe</i>            |
| [11]      | GFP           | C-terminal           | C-terminal fusion does not complement <i>rad51</i> <sup>-/-</sup>      | Ns                   | Ns                   | Chicken DT40 cells                          |
| [12]      | GFP           | C-terminal           | C-terminal fusion does not complement and has dominant negative effect | Ns                   | Ns                   | Human cells (HEK293)                        |
| [21]      | GFP           | C-terminal           | Ns                                                                     | +                    | Ns                   | <i>Trypanosoma brucei</i>                   |
| [22-24]   | GFP, RFP      | C-terminal           | Ns                                                                     | ns                   | +                    | <i>Sordaria macrospora</i>                  |

<sup>1</sup>YFP was fused to a *rad51*-I345T mutant encoding protein with a higher affinity for DNA than wild-type RAD51

#### REFERENCES

1. Lisby M, Barlow JH, Burgess RC, Rothstein R (2004) Choreography of the DNA damage response: spatiotemporal relationships among checkpoint and repair proteins. *Cell* 118: 699-713.
2. Kaiser GS, Germann SM, Westergaard T, Lisby M (2011) Phenylbutyrate inhibits homologous recombination induced by camptothecin and methyl methanesulfonate. *Mutation research* 713: 64-75.

3. Torres-Rosell J, Sunjevaric I, De Piccoli G, Sacher M, Eckert-Boulet N, et al. (2007) The Smc5-Smc6 complex and SUMO modification of Rad52 regulates recombinational repair at the ribosomal gene locus. *Nature cell biology* 9: 923-931.
4. Fung CW, Mozin AM, Symington LS (2009) Suppression of the double-strand-break-repair defect of the *Saccharomyces cerevisiae* rad57 mutant. *Genetics* 181: 1195-1206.
5. Fasullo M, Chen Y, Bortosh W, Sun M, Egner PA (2010) Aflatoxin B(1)-Associated DNA Adducts Stall S Phase and Stimulate Rad51 foci in *Saccharomyces cerevisiae*. *Journal of nucleic acids* 2010: 456487.
6. Essers J, Houtsmuller AB, van Veelen L, Paulusma C, Nigg AL, et al. (2002) Nuclear dynamics of RAD52 group homologous recombination proteins in response to DNA damage. *The EMBO journal* 21: 2030-2037.
7. Banath JP, Klovov D, MacPhail SH, Banuelos CA, Olive PL (2010) Residual gammaH2AX foci as an indication of lethal DNA lesions. *BMC cancer* 10: 4.
8. van Veelen LR, Essers J, van de Rakt MW, Odijk H, Pastink A, et al. (2005) Ionizing radiation-induced foci formation of mammalian Rad51 and Rad54 depends on the Rad51 paralogs, but not on Rad52. *Mutation research* 574: 34-49.
9. Kim TM, Ko JH, Hu L, Kim SA, Bishop AJ, et al. (2012) RAD51 mutants cause replication defects and chromosomal instability. *Molecular and cellular biology* 32: 3663-3680.
10. Pellegrini L, Yu DS, Lo T, Anand S, Lee M, et al. (2002) Insights into DNA recombination from the structure of a RAD51-BRCA2 complex. *Nature* 420: 287-293.
11. Yu DS, Sonoda E, Takeda S, Huang CL, Pellegrini L, et al. (2003) Dynamic control of Rad51 recombinase by self-association and interaction with BRCA2. *Molecular cell* 12: 1029-1041.
12. Forget AL, Loftus MS, McGrew DA, Bennett BT, Knight KL (2007) The human Rad51 K133A mutant is functional for DNA double-strand break repair in human cells. *Biochemistry* 46: 3566-3575.
13. Kojic M, Mao N, Zhou Q, Lisby M, Holloman WK (2008) Compensatory role for Rad52 during recombinational repair in *Ustilago maydis*. *Molecular microbiology* 67: 1156-1168.
14. Kojic M, Zhou Q, Lisby M, Holloman WK (2006) Rec2 interplay with both Brh2 and Rad51 balances recombinational repair in *Ustilago maydis*. *Molecular and cellular biology* 26: 678-688.
15. Mielnichuk N, Sgarlata C, Perez-Martin J (2009) A role for the DNA-damage checkpoint kinase Chk1 in the virulence program of the fungus *Ustilago maydis*. *Journal of cell science* 122: 4130-4140.
16. Ndindeng SA, Miki S, Abe A, Asano K, Sone T (2010) EGFP-Rhm51 foci enable the visualization and enumeration of DNA double-strand breaks in *Magnaporthe oryzae*. *J Gen Plant Pathol* 76: 377-381.
17. Lettier G, Feng Q, de Mayolo AA, Erdeniz N, Reid RJ, et al. (2006) The role of DNA double-strand breaks in spontaneous homologous recombination in *S. cerevisiae*. *PLoS genetics* 2: e194.
18. Moore DM, Karlin J, Gonzalez-Barrera S, Mardiros A, Lisby M, et al. (2009) Rad10 exhibits lesion-dependent genetic requirements for recruitment to DNA double-strand breaks in *Saccharomyces cerevisiae*. *Nucleic acids research* 37: 6429-6438.
19. Akamatsu Y, Tsutsui Y, Morishita T, Siddique MS, Kurokawa Y, et al. (2007) Fission yeast Swi5/Sfr1 and Rhp55/Rhp57 differentially regulate Rhp51-dependent recombination outcomes. *The EMBO journal* 26: 1352-1362.
20. Okamoto SY, Sato M, Toda T, Yamamoto M (2012) SCF ensures meiotic chromosome segregation through a resolution of meiotic recombination intermediates. *PloS one* 7: e30622.
21. Glover L, Horn D (2012) Trypanosomal histone gammaH2A and the DNA damage response. *Molecular and biochemical parasitology* 183: 78-83.
22. Tesse S, Storlazzi A, Kleckner N, Gargano S, Zickler D (2003) Localization and roles of Ski8p protein in *Sordaria* meiosis and delineation of three mechanistically distinct steps of meiotic homolog juxtaposition. *Proceedings of the National Academy of Sciences of the United States of America* 100: 12865-12870.
23. Storlazzi A, Gargano S, Ruprich-Robert G, Falque M, David M, et al. (2010) Recombination proteins mediate meiotic spatial chromosome organization and pairing. *Cell* 141: 94-106.
24. Storlazzi A, Tesse S, Ruprich-Robert G, Gargano S, Poggeler S, et al. (2008) Coupling meiotic chromosome axis integrity to recombination. *Genes & development* 22: 796-809.
