# Supplementary material
Source: publisher figshare collection journal article supplement (https://plos.figshare.com/articles/dataset/_/808666)
Supplement: Supplementary file [file 1]

**Supplemental Table S1. List of PCR markers between Col and Ler.**

For each marker, the corresponding Bacterial Artificial Chromosome, primers, size of the Columbia and Landsberg products, and the physical distance of the intervals are listed.

| Marker Name | Chr | BAC   | Forward primer sequence | Reverse primer sequence | Marker type | Col / Ler length | Physical distance (Mb) |
|-------------|-----|-------|-------------------------|-------------------------|-------------|------------------|------------------------|
| C1M1        | 1   | F10O3 | TGCATTGCATTTTGGATTA     | CCGAAAAATATCAAGTGTTG    | InDel       | 283 / 234        | 3.8                    |
| C1M2        | 1   | F3F19 | CGACGCATCAACAATGTACT    | GCTTGGAATCGGCTTCTCTT    | InDel       | 326 / 249        |                        |
| C3M1        | 3   | F4P13 | AATCTAACAAGGCAAAAGGTC   | CTCGCAACCAACCTACAAG     | InDel       | 215 / 164        | 5.6                    |
| C3M2        | 3   | T2O4  | GAAGTGCAATTGATGGAAACC   | TGGAAATGATACTCTACTCGG   | InDel       | 256 / 157        |                        |
