# Supplementary material
Source: publisher figshare collection journal article supplement (https://plos.figshare.com/articles/dataset/_/808666)
Supplement: Supplementary file [file 1]

|         |                                                                  |     |
|---------|------------------------------------------------------------------|-----|
| ScRAD51 | MSQVQEQHISESQLQYGNGLMSTVPADLSQSVDGNGNGSSEDI EATNGSGDGGGLQEQ      | 60  |
| AtRAD51 | -----MTTMEQRNQNNAVQ-----QQDDEETQHGP-----                         | 25  |
|         | *:* : .*. *: ..*: * : :*                                         |     |
| <br>    |                                                                  |     |
| ScRAD51 | AEAQGEMEDEAYDEAALGSFVPIEKLQVNGITMADVKKLRESGLHTAEAVAYAPRKDLLE     | 120 |
| AtRAD51 | -----FPVEQLQAAGIASVDVKKLRDAGLCTVEGVAYTPRKDLLQ                    | 65  |
|         | .*:*:** . **: .*****::** *.*.***:*****:                          |     |
| <br>    |                                                                  |     |
| ScRAD51 | IKGISEAKADKLLNEAARLVPMGFVTAADFHMRRSELICLTGSKNLDTLLGGGVETGSI      | 180 |
| AtRAD51 | IKGISDAKVVDKIVEAASKLVPLGFTSASQLHAQRQEIIQITSGSRELDKVLEGGIETGSI    | 125 |
|         | *****:**.**: :: *:*:*:*.*:*:*: *.*:* :*:*:*:*.*: **:*****        |     |
| <br>    |                                                                  |     |
| ScRAD51 | TELFGEFRRTGKSQ LCHTLAVTCQIPLDIGGGEGKCLYIDTEGTFRPVRLVSIAQRFGLDP   | 240 |
| AtRAD51 | TELYGEFRSRGKTQLCHTLCVTCQLPMDQGGGGEGKAMYIDAEGTFRPQ RLLQIADRFG LNG | 185 |
|         | ***:***: **.*****.*****:*: * *****.:***:***** **:.**:****:       |     |
| <br>    |                                                                  |     |
| ScRAD51 | DDALNNVAYARAYNADHQLRLLDAAAQMMSES RFSLIVVDSVMALYRTDFSGRGELSARQ    | 300 |
| AtRAD51 | ADVLENVAYARAYNTDHQSRLLEAA SMMIETR FALLIVDSATALYRTDFSGRGELSARQ    | 245 |
|         | *.*:*****:*** ** *.*. *.*:*.*:*:*. *****                         |     |
| <br>    |                                                                  |     |
| ScRAD51 | MHLAKFMRALQRLADQFGVAVVV TNQVVAQVDGGMAFNPD PKPIGGNIMAH SSTTRLGF   | 360 |
| AtRAD51 | MHLAKFLRSLQKL ADEF G VAVVITNQVVAQVDGSALFAGP QFKPIGGNIMAHATTTRLAL | 305 |
|         | *****:*.**:*:*****:*****. * *****:*****.:                        |     |
| <br>    |                                                                  |     |
| ScRAD51 | KKGKGCQRLCKVV D SPCLPEAE CVFAIYEDGVGDPREEDE                      | 400 |
| AtRAD51 | RKGRAEERICKVISSPCLPEAEAR FQISTEGVTDC KD---                       | 342 |
|         | :**:. *:***:*****. * * :** * :                                   |     |
